# Supplementary material
Source: Elsevier journal article supplement (https://www.sciencedirect.com/science/article/pii/S1134009615000157)
Supplement: mmc1 [file S1134009615000157:mmc1.docx]

**ANEXO 1. RELACIÓN DE ASISTENTES A LA REUNIÓN CELEBRADA EN MADRID EL 12/XI/2014 Y SUS UNIDADES DOCENTES.**

| **FUNDACION JIMENEZ DIAZ** | **Aldamiz-Echevarría** | **Gonzalo** |
| --- | --- | --- |
| **HOSPITAL DE CRUCES. BARACALDO** | **Aramendi Gallardo** | **José I.** |
| **HOSPITAL MIGUEL SERVET** | **Ballester Cuenca** | **Carlos** |
| **HOSPITAL UNIVERSITARIO VIRGEN MACARENA** | **Barquero Aroca** | **Jose Miguel** |
| **HOSPITAL LA PAZ** | **Blázquez** | **José Antonio** |
| **HOSPITAL UNIVERSITARIO SON ESPASES** | **Saez De Ibarra** | **José Ignacio** |
| **HOSPITAL UNIV. VIRGEN DEL ROCIO** | **Borrego Domínguez** | **Jose Miguel** |
| **HOSPITAL VIRGEN DE LA ARRIXACA** | **Cánovas López** | **Sergio Juan** |
| **COMPLEJO HOSPITALARIO DE TOLEDO** | **Cañas Cañas** | **Alfonso** |
| **HOSPITAL CLINICO UNIVERSITARIO VALLADOLID** | **Carrascal Hinojal** | **Yolanda** |
| **HOSPITAL RAMON Y CAJAL** | **Celemín Canorea** | **Daniel** |
| **HOSPITAL MATERNO INFANTIL DOCE DE OCTUBRE** | **Comas Illas** | **Juan-Valentín** |
| **HOSPITAL DOCE DE OCTUBRE- ADULTOS** | **Cortina Romero** | **Jose Mª** |
| **COMPLEJO HOSPITALARIO UNIVERSITARIO A Coruña** | **Cuenca Castillo** | **José Joaquín** |
| **HOSPITAL DE NAVARRA** | **Fernández Rodríguez** | **Juan Luis** |
| **HOSPITAL VALLE DE HEBRON** | **Galiñanes** | **Manuel** |
| **COMPLEJO HOSPITALARIO UNIV. DE CANARIAS** | **Garrido Martín** | **Pilar** |
| **HOSPITAL RAMON Y CAJAL - INFANTIL** | **Gómez González** | **Ricardo** |
| **HOSPITAL CLINICO UNIVERSITARIO DE SALAMANCA** | **González Santos** | **José María** |
| **HOSPITAL UNIVERSITARIO MARQUES DE VALDECILLA** | **Gutierrez Díez** | **J.Francisco** |
| **HOSPITAL GENERAL UNIVERSITARIO DE ALICANTE** | **Llamas Juan** | **Patricio** |
| **HOSPITEN RAMBLA** | **Llorens León** | **Rafael** |
| **HOSPITAL CLINICO SAN CARLOS** | **Maroto Castellanos** | **Luis Carlos** |
| **HOSPITAL GENERAL UNIVERSITARIO DE VALENCIA** | **Hornero** | **Fernando** |
| **HOSPITAL DO MEIXOEIRO (Galaria)** | **Piñón Esteban** | **Miguel** |
| **HOSPITAL DE LA PRINCESA** | **Reyes Copa** | **Guillermo** |
| **HOSPITAL GERMANS TRIAS I PUJOL " CAN RUTI"** | **Ruyra Baliarda** | **Xavier** |
| **HOSPITAL UNIVERSITARIO PUERTA DE HIERRO** | **Serrano Fiz** | **Santiago** |
| **HOSPITAL CLÍNICO UNIVERSITARIO DE SANTIAGO** | **Sierra Quiroga** | **Juan Luis** |
| **HOSPITAL UNIVERSITARIO CENTRAL DE ASTURIAS** | **Silva Guisasola** | **Jacobo** |
| **HOSPITAL LA FE** | **Valera Martínez** | **Fco. José** |
| **LA PAZ. HOSPITAL INFANTIL** | **Villagrá Blanco** | **Fernando** |
| **HOSPITAL CLINIC BARCELONA** | **Josa** | **Miguel** |
